# Supplementary material for: Species Richness of Papilionidae Butterflies (Lepidoptera: Papilionoidea) in the Hengduan Mountains and Its Future Shifts under Climate Change
Source: MDPI journal article supplement (doi:10.3390/insects14030259), 2023-03-06
Supplement: s1 [file s1]

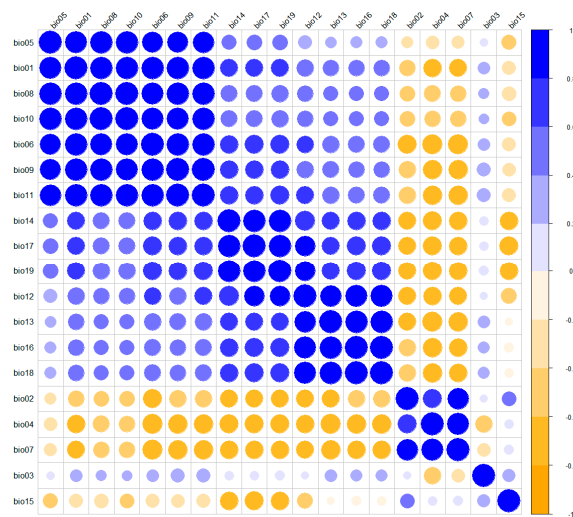

(a) Current

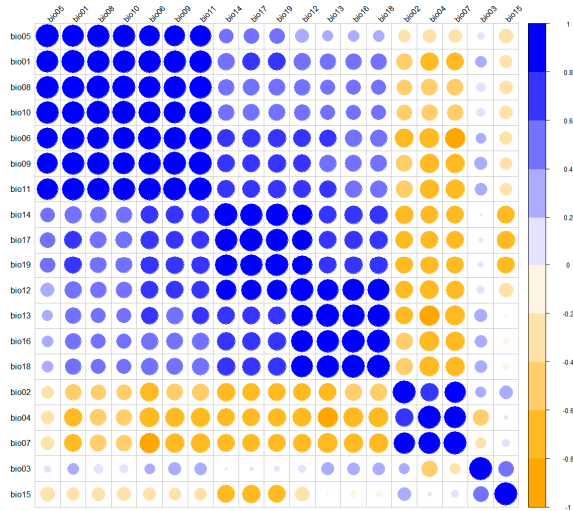

(b) RCP2.6 2050

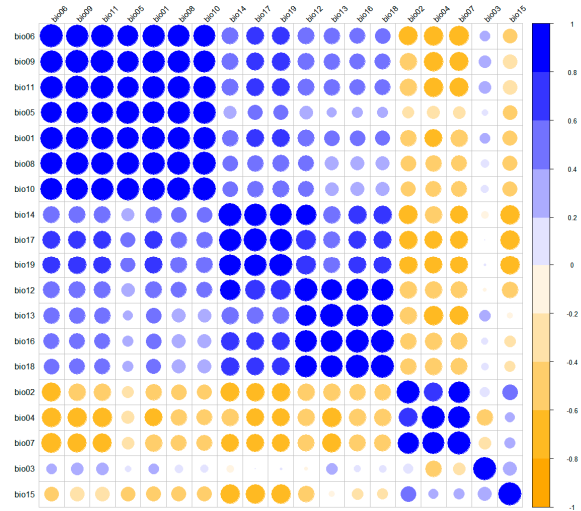

(c) RCP4.5 2050

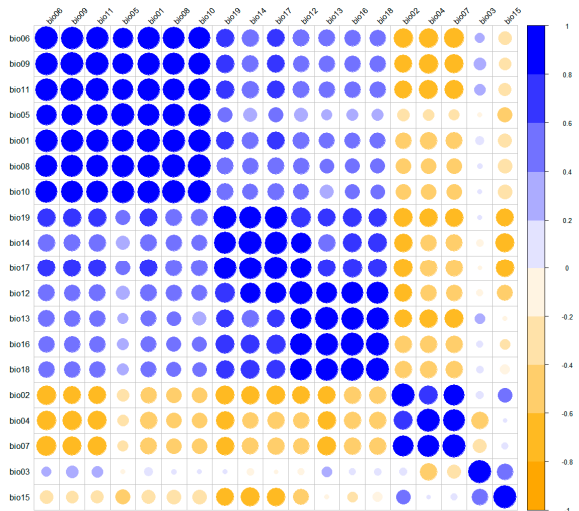

(d) RCP8.5 2050

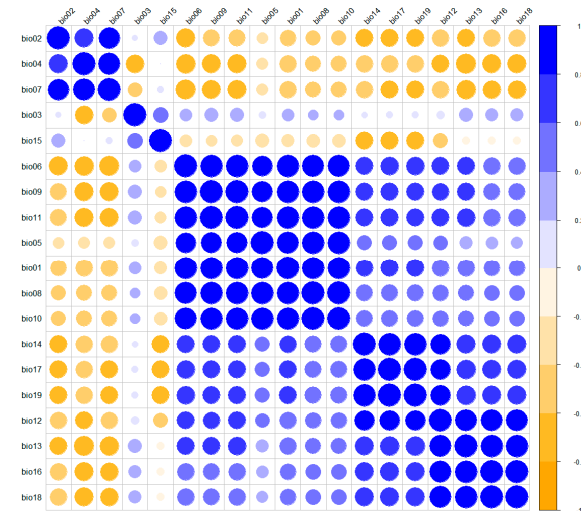

(e) RCP2.6 2070

(continued)

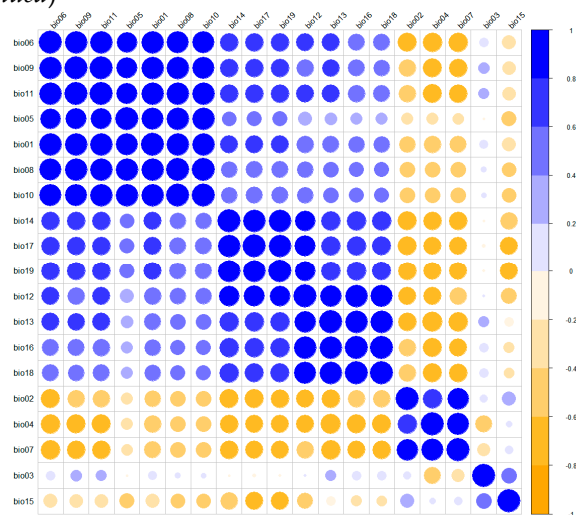

(f) RCP4.5 2070

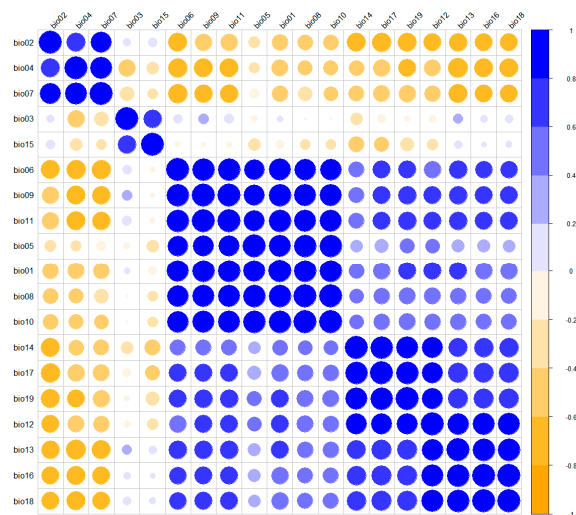

(g) RCP8.5 2070

**Figure S3.** Pearson correlation matrices of the 19 BioClim variables, circle sizes are proportional to the absolute correlation coefficient values, red colour represents minus and blue colour represents plus.
