# Supplementary material for: Species Richness of Papilionidae Butterflies (Lepidoptera: Papilionoidea) in the Hengduan Mountains and Its Future Shifts under Climate Change
Source: MDPI journal article supplement (doi:10.3390/insects14030259), 2023-03-06
Supplement: s1 [file s1]

*Parnassius labeyriei*

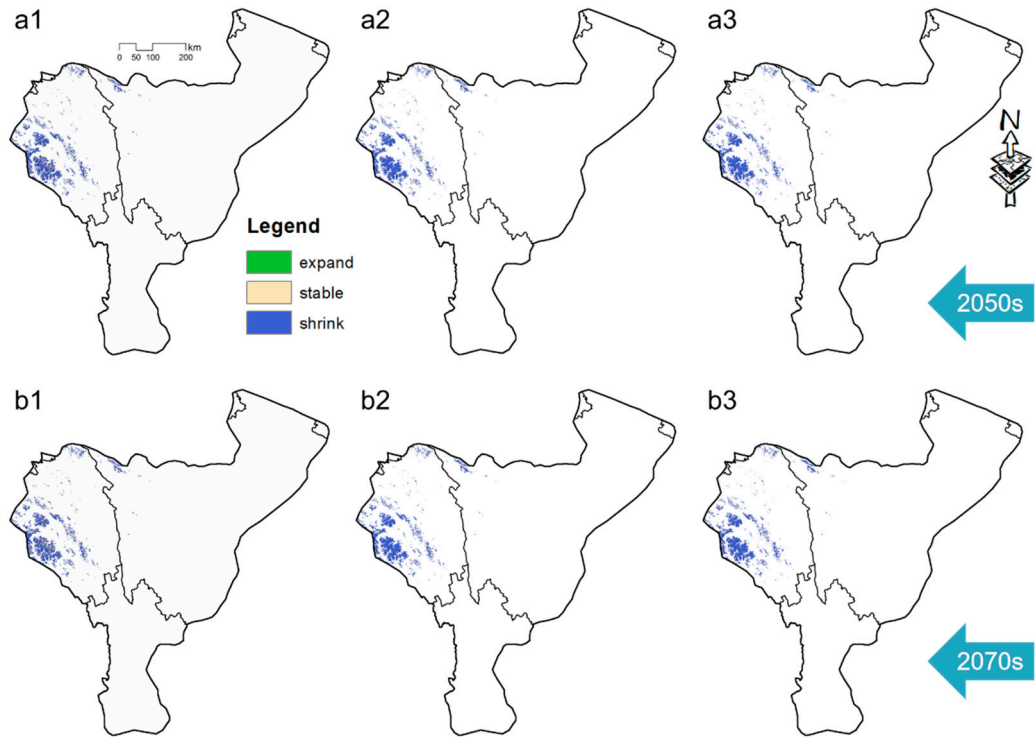

*Parnassius imperator*

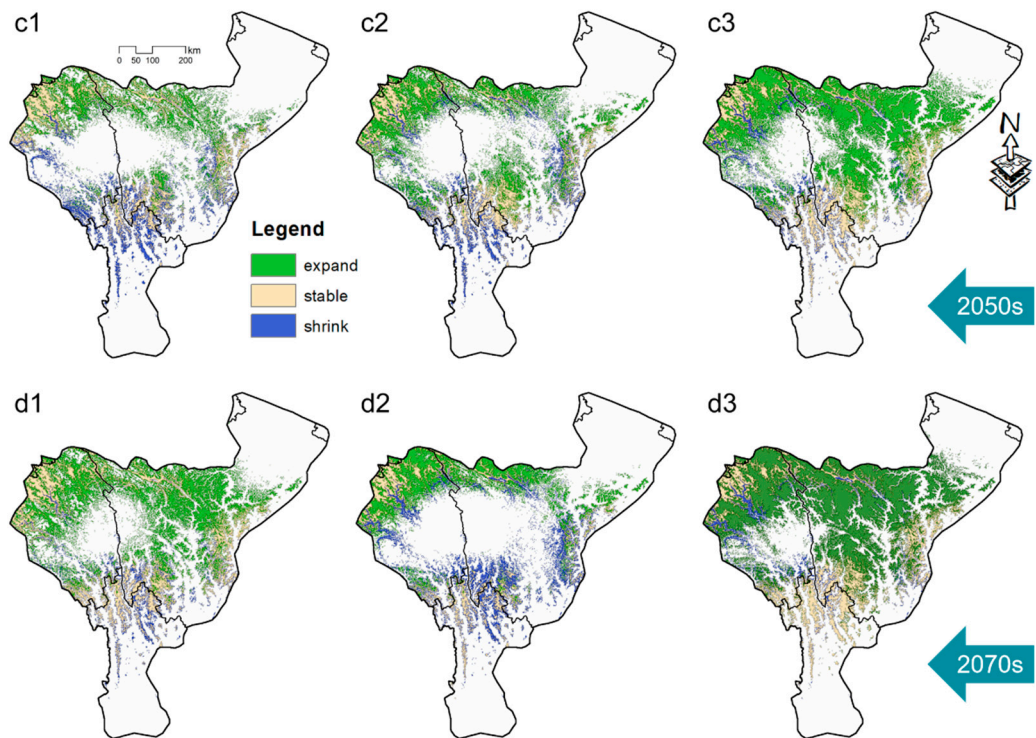

(continued)

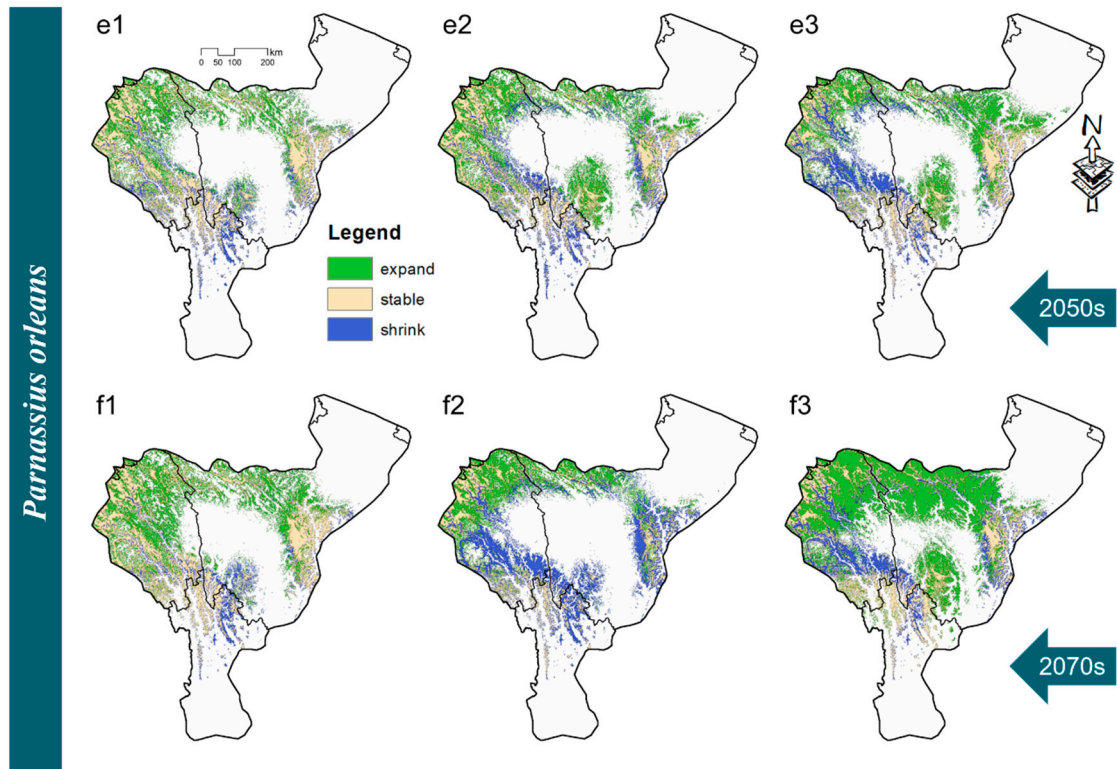

**Figure S4.** The projected distributional maps for the *Parnassius labeyriei*, *P. imperator*, and *P. orleans* species in the HDMs under climate change. Colors on the map show contraction (blue), stable (yellow), and expansion (red) from the current to the 2050s and 2070s, respectively, under three climate scenarios RCP 2.6 (1), RCP 4.5 (2), and RCP8.5 (3).
