# Supplementary material for: Species Richness of Papilionidae Butterflies (Lepidoptera: Papilionoidea) in the Hengduan Mountains and Its Future Shifts under Climate Change
Source: MDPI journal article supplement (doi:10.3390/insects14030259), 2023-03-06
Supplement: s1 [file s1]

**Table S1.** Species records, AUC values under all climate scenarios, and the importance of BioClim variables in Maxent analysis, with the greatest values in red and the smallest values in green.

| Species                         | No. of points | AUC values |        |        |        |        |        |        |
|---------------------------------|---------------|------------|--------|--------|--------|--------|--------|--------|
|                                 |               | Current    | 2050s  |        |        | 2070s  |        |        |
|                                 |               |            | RCP2.6 | RCP4.5 | RCP8.5 | RCP2.6 | RCP4.5 | RCP8.5 |
| Parnassiinae                    |               |            |        |        |        |        |        |        |
| <i>Parnassius acco</i>          | 36            | 0.902      | 0.904  | 0.893  | 0.901  | 0.918  | 0.916  | 0.927  |
| <i>Parnassius accestis</i>      | 26            | 0.904      | 0.922  | 0.917  | 0.904  | 0.899  | 0.903  | 0.884  |
| <i>Parnassius cephalus</i>      | 90            | 0.856      | 0.881  | 0.855  | 0.855  | 0.879  | 0.876  | 0.888  |
| <i>Parnassius epaphus</i>       | 44            | 0.791      | 0.821  | 0.826  | 0.788  | 0.796  | 0.764  | 0.785  |
| <i>Parnassius hide</i>          | 11            | 0.924      | 0.932  | 0.938  | 0.928  | 0.923  | 0.924  | 0.922  |
| <i>Parnassius imperator</i>     | 65            | 0.783      | 0.807  | 0.803  | 0.770  | 0.801  | 0.811  | 0.792  |
| <i>Parnassius labeyriei</i>     | 14            | 0.982      | 0.973  | 0.981  | 0.980  | 0.982  | 0.981  | 0.981  |
| <i>Parnassius mercurius</i>     | 35            | 0.868      | 0.873  | 0.864  | 0.884  | 0.856  | 0.852  | 0.887  |
| <i>Parnassius orleans</i>       | 63            | 0.792      | 0.838  | 0.815  | 0.795  | 0.814  | 0.840  | 0.808  |
| <i>Parnassius simo</i>          | 26            | 0.863      | 0.894  | 0.882  | 0.854  | 0.889  | 0.899  | 0.857  |
| <i>Parnassius szechenyi</i>     | 28            | 0.865      | 0.864  | 0.867  | 0.864  | 0.879  | 0.888  | 0.885  |
| <i>Bhutanitis lidderdalii</i>   | 19            | 0.982      | 0.982  | 0.982  | 0.981  | 0.982  | 0.982  | 0.980  |
| <i>Bhutanitis mansfieldi</i>    | 9             | 0.962      | 0.939  | 0.969  | 0.950  | 0.970  | 0.973  | 0.949  |
| <i>Bhutanitis thaidina</i>      | 39            | 0.958      | 0.956  | 0.961  | 0.961  | 0.953  | 0.956  | 0.956  |
| Papilioninae                    |               |            |        |        |        |        |        |        |
| <i>Lamproptera curius</i>       | 22            | 0.984      | 0.984  | 0.981  | 0.982  | 0.985  | 0.985  | 0.984  |
| <i>Lamproptera meges</i>        | 18            | 0.983      | 0.982  | 0.984  | 0.983  | 0.988  | 0.988  | 0.988  |
| <i>Iphiclides podalirinus</i>   | 13            | 0.976      | 0.975  | 0.975  | 0.980  | 0.958  | 0.958  | 0.967  |
| <i>Graphium chironides</i>      | 19            | 0.986      | 0.988  | 0.986  | 0.986  | 0.989  | 0.988  | 0.988  |
| <i>Graphium cloanthus</i>       | 52            | 0.976      | 0.976  | 0.974  | 0.975  | 0.973  | 0.972  | 0.974  |
| <i>Graphium confucius</i>       | 9             | 0.853      | 0.858  | 0.854  | 0.840  | 0.927  | 0.926  | 0.919  |
| <i>Graphium doson</i>           | 15            | 0.984      | 0.984  | 0.985  | 0.985  | 0.990  | 0.990  | 0.990  |
| <i>Graphium eurous</i>          | 21            | 0.984      | 0.987  | 0.988  | 0.989  | 0.985  | 0.989  | 0.987  |
| <i>Graphium mandarinus</i>      | 34            | 0.978      | 0.981  | 0.981  | 0.980  | 0.964  | 0.977  | 0.977  |
| <i>Graphium parus</i>           | 19            | 0.983      | 0.986  | 0.988  | 0.983  | 0.977  | 0.987  | 0.984  |
| <i>Graphium sarpedon</i>        | 40            | 0.980      | 0.985  | 0.980  | 0.979  | 0.974  | 0.973  | 0.974  |
| <i>Graphium sichuanica</i>      | 8             | 0.987      | 0.988  | 0.988  | 0.988  | 0.989  | 0.989  | 0.989  |
| <i>Graphium tamerlanus</i>      | 16            | 0.992      | 0.991  | 0.992  | 0.991  | 0.996  | 0.996  | 0.996  |
| <i>Teinopalpus imperialis</i>   | 8             | 0.976      | 0.976  | 0.984  | 0.982  | 0.978  | 0.989  | 0.984  |
| <i>Pachliopta aristolochiae</i> | 33            | 0.989      | 0.988  | 0.989  | 0.990  | 0.988  | 0.988  | 0.987  |
| <i>Troides aeacus</i>           | 42            | 0.963      | 0.960  | 0.962  | 0.962  | 0.961  | 0.962  | 0.964  |
| <i>Byasa confusus</i>           | 9             | 0.987      | 0.986  | 0.987  | 0.987  | 0.987  | 0.987  | 0.986  |
| <i>Byasa daemonius</i>          | 26            | 0.978      | 0.979  | 0.972  | 0.976  | 0.974  | 0.972  | 0.971  |
| <i>Byasa dasarada</i>           | 26            | 0.985      | 0.987  | 0.983  | 0.984  | 0.991  | 0.990  | 0.991  |
| <i>Byasa genestieri</i>         | 11            | 0.989      | 0.989  | 0.989  | 0.989  | 0.989  | 0.988  | 0.987  |
| <i>Byasa hedistus</i>           | 46            | 0.958      | 0.945  | 0.961  | 0.961  | 0.960  | 0.962  | 0.964  |
| <i>Byasa latreillei</i>         | 15            | 0.992      | 0.992  | 0.991  | 0.991  | 0.993  | 0.994  | 0.992  |
| <i>Byasa nevillei</i>           | 83            | 0.975      | 0.976  | 0.974  | 0.975  | 0.978  | 0.979  | 0.980  |
| <i>Byasa plutonius</i>          | 71            | 0.968      | 0.966  | 0.966  | 0.968  | 0.967  | 0.970  | 0.971  |
| <i>Byasa polyeuctes</i>         | 101           | 0.959      | 0.957  | 0.962  | 0.960  | 0.961  | 0.962  | 0.962  |
| <i>Byasa rhadinus</i>           | 12            | 0.989      | 0.988  | 0.981  | 0.983  | 0.986  | 0.985  | 0.982  |
| <i>Meandrusa lachinus</i>       | 13            | 0.980      | 0.976  | 0.978  | 0.978  | 0.981  | 0.979  | 0.988  |
| <i>Meandrusa sciron</i>         | 13            | 0.992      | 0.993  | 0.993  | 0.992  | 0.994  | 0.994  | 0.994  |
| <i>Papilio agestor</i>          | 18            | 0.981      | 0.986  | 0.980  | 0.982  | 0.982  | 0.982  | 0.981  |
| <i>Papilio alcmenor</i>         | 25            | 0.987      | 0.975  | 0.977  | 0.978  | 0.977  | 0.976  | 0.974  |
| <i>Papilio arcturus</i>         | 23            | 0.984      | 0.982  | 0.980  | 0.981  | 0.981  | 0.981  | 0.981  |
| <i>Papilio bianor</i>           | 60            | 0.972      | 0.968  | 0.972  | 0.972  | 0.970  | 0.969  | 0.969  |
| <i>Papilio bootes</i>           | 32            | 0.969      | 0.966  | 0.968  | 0.968  | 0.980  | 0.979  | 0.978  |
| <i>Papilio epycides</i>         | 37            | 0.978      | 0.979  | 0.978  | 0.980  | 0.977  | 0.979  | 0.981  |
| <i>Papilio helenus</i>          | 33            | 0.966      | 0.967  | 0.966  | 0.967  | 0.964  | 0.965  | 0.966  |
| <i>Papilio krishna</i>          | 18            | 0.965      | 0.961  | 0.966  | 0.964  | 0.983  | 0.983  | 0.983  |
| <i>Papilio maackii</i>          | 42            | 0.955      | 0.944  | 0.956  | 0.955  | 0.961  | 0.963  | 0.962  |
| <i>Papilio machaon</i>          | 56            | 0.952      | 0.945  | 0.954  | 0.952  | 0.950  | 0.957  | 0.955  |
| <i>Papilio macilentus</i>       | 7             | 0.987      | 0.988  | 0.988  | 0.988  | 0.987  | 0.987  | 0.988  |
| <i>Papilio memnon</i>           | 27            | 0.986      | 0.987  | 0.984  | 0.986  | 0.986  | 0.987  | 0.985  |
| <i>Papilio nephelus</i>         | 22            | 0.978      | 0.979  | 0.977  | 0.977  | 0.980  | 0.979  | 0.979  |
| <i>Papilio paris</i>            | 24            | 0.979      | 0.979  | 0.976  | 0.976  | 0.977  | 0.978  | 0.977  |
| <i>Papilio polytes</i>          | 78            | 0.961      | 0.954  | 0.966  | 0.963  | 0.955  | 0.960  | 0.958  |
| <i>Papilio protenor</i>         | 59            | 0.969      | 0.971  | 0.971  | 0.972  | 0.967  | 0.969  | 0.969  |

|                       |    |       |       |       |       |       |       |       |
|-----------------------|----|-------|-------|-------|-------|-------|-------|-------|
| <i>Papilio xuthus</i> | 77 | 0.963 | 0.960 | 0.966 | 0.963 | 0.958 | 0.960 | 0.959 |
| Minimum               | —  | 0.783 | 0.807 | 0.803 | 0.770 | 0.796 | 0.764 | 0.785 |
| Maximum               | —  | 0.992 | 0.993 | 0.993 | 0.992 | 0.996 | 0.996 | 0.996 |
| Mean                  | —  | 0.954 | 0.956 | 0.956 | 0.954 | 0.957 | 0.958 | 0.957 |
| SD                    | —  | 0.053 | 0.046 | 0.048 | 0.054 | 0.047 | 0.048 | 0.049 |
| >0.9 (%)              | —  | 86.4  | 86.4  | 84.7  | 86.4  | 86.4  | 88.1  | 86.4  |
| 0.8–0.9 (%)           | —  | 8.5   | 13.6  | 15.3  | 8.5   | 11.9  | 10.2  | 10.2  |
