# Supplementary material for: Species Richness of Papilionidae Butterflies (Lepidoptera: Papilionoidea) in the Hengduan Mountains and Its Future Shifts under Climate Change
Source: MDPI journal article supplement (doi:10.3390/insects14030259), 2023-03-06
Supplement: s1 [file s1]

**Table S2.** Environmental factors and their interpretation.

| Code  | Environment factors                                       |
|-------|-----------------------------------------------------------|
| Bio1  | Annual mean temperature/°C                                |
| Bio2  | Mean diurnal temperature range (mean (period max-min)/°C) |
| Bio3  | Isothermality (Bio2/Bio7×100)                             |
| Bio4  | Temperature seasonality                                   |
| Bio5  | Max temperature of warmest month/°C                       |
| Bio6  | Min temperature of coldest month/°C                       |
| Bio7  | Temperature annual range (Bio5-Bio6)/°C                   |
| Bio8  | Mean temperature of wettest quarter/°C                    |
| Bio9  | Mean temperature of driest quarter/°C                     |
| Bio10 | Mean temperature of warmest quarter/°C                    |
| Bio11 | Mean temperature of coldest quarter/°C                    |
| Bio12 | Annual precipitation/mm                                   |
| Bio13 | Precipitation of wettest month/mm                         |
| Bio14 | Precipitation of driest month/mm                          |
| Bio15 | Coefficient of variation of precipitation seasonality     |
| Bio16 | Precipitation of wettest quarter/mm                       |
| Bio17 | Precipitation of driest quarter/mm                        |
| Bio18 | Precipitation of warmest quarter/mm                       |
| Bio19 | Precipitation of coldest quarter/mm                       |
