# Supplementary material for: Species Richness of Papilionidae Butterflies (Lepidoptera: Papilionoidea) in the Hengduan Mountains and Its Future Shifts under Climate Change
Source: MDPI journal article supplement (doi:10.3390/insects14030259), 2023-03-06
Supplement: s1 [file s1]

**Table S3.** Suitable area and changes of Papilionidae butterflies in the Hengduan Mountains (HDMs) under different climatic scenarios.

| Species                       | Suitable area (km <sup>2</sup> )<br>Percentage of suitable area change (%) |                 |                 |                  |                  |                 |                  |
|-------------------------------|----------------------------------------------------------------------------|-----------------|-----------------|------------------|------------------|-----------------|------------------|
|                               | Current                                                                    | 2050s<br>RCP2.6 | 2050s<br>RCP4.5 | 2050s<br>RCP8.5  | 2070s<br>RCP2.6  | 2070s<br>RCP4.5 | 2070s<br>RCP8.5  |
| <i>Parnassius acco</i>        | 47334                                                                      | 27248<br>-42.43 | 20109<br>-57.52 | 16624<br>-64.88  | 23880<br>-49.55  | 19137<br>-59.57 | 8436<br>-82.18   |
| <i>Parnassius acdestis</i>    | 65093                                                                      | 77713<br>19.39  | 18869<br>-71.01 | 30334<br>-53.40  | 75134<br>15.43   | 55070<br>-15.40 | 48081<br>-26.13  |
| <i>Parnassius cephalus</i>    | 42652                                                                      | 33424<br>-21.64 | 36954<br>-13.36 | 42597<br>-0.13   | 39893<br>-6.47   | 43208<br>1.30   | 24642<br>-42.23  |
| <i>Parnassius epaphus</i>     | 111058                                                                     | 85787<br>-22.75 | 58183<br>-47.61 | 51481<br>-53.64  | 103943<br>-6.41  | 56404<br>-49.21 | 47042<br>-57.64  |
| <i>Parnassius hide</i>        | 37221                                                                      | 15841<br>-57.44 | 13267<br>-64.36 | 382<br>-98.97    | 12456<br>-66.54  | 0<br>-100       | 0<br>-100        |
| <i>Parnassius imperator</i>   | 75971                                                                      | 94339<br>24.18  | 120058<br>58.03 | 182304<br>139.97 | 153614<br>102.20 | 93394<br>22.93  | 204969<br>169.80 |
| <i>Parnassius labeyriei</i>   | 8984                                                                       | 753<br>-91.62   | 6<br>-99.93     | 0<br>-100        | 985<br>-89.04    | 1<br>-99.99     | 0<br>-100        |
| <i>Parnassius mercurius</i>   | 84203                                                                      | 77259<br>-8.25  | 70079<br>-16.77 | 840<br>-99.00    | 48119<br>-42.85  | 36517<br>-56.63 | 33545<br>-60.16  |
| <i>Parnassius orleans</i>     | 95108                                                                      | 123826<br>30.20 | 127679<br>34.25 | 121512<br>27.76  | 143347<br>50.72  | 86493<br>-9.06  | 173990<br>82.94  |
| <i>Parnassius simo</i>        | 60759                                                                      | 47189<br>-22.33 | 22505<br>-62.96 | 17250<br>-71.61  | 45495<br>-25.12  | 30702<br>-49.47 | 7865<br>-87.06   |
| <i>Parnassius szechenyi</i>   | 64004                                                                      | 26977<br>-57.85 | 12656<br>-80.23 | 7495<br>-88.29   | 30295<br>-52.67  | 20154<br>-68.51 | 4451<br>-93.05   |
| <i>Bhutanitis lidderdalii</i> | 13174                                                                      | 278<br>-97.89   | 2742<br>-79.19  | 7973<br>-39.48   | 11878<br>-9.84   | 19343<br>46.83  | 7313<br>-44.49   |
| <i>Bhutanitis mansfieldi</i>  | 28761                                                                      | 50415<br>75.29  | 41559<br>44.50  | 25011<br>-13.04  | 36983<br>28.59   | 40486<br>40.77  | 19223<br>-33.16  |
| <i>Bhutanitis thaidina</i>    | 17778                                                                      | 33641<br>89.23  | 18351<br>3.22   | 3643<br>-79.51   | 18333<br>3.12    | 10136<br>-42.99 | 4134<br>-76.75   |
| <i>Lamproptera curius</i>     | 4594                                                                       | 10820<br>135.52 | 8102<br>76.36   | 6474<br>40.92    | 8392<br>82.67    | 4098<br>-10.80  | 5407<br>17.70    |
| <i>Lamproptera meges</i>      | 2773                                                                       | 3491<br>25.89   | 2568<br>-7.39   | 35<br>-98.74     | 8094<br>191.89   | 10870<br>291.99 | 17910<br>545.87  |
| <i>Iphiclides podalirinus</i> | 7461                                                                       | 19381<br>159.76 | 25006<br>235.16 | 29360<br>293.51  | 15849<br>112.42  | 23301<br>212.30 | 54719<br>633.40  |
| <i>Graphium chironides</i>    | 4259                                                                       | 8917<br>109.37  | 3793<br>-10.94  | 4450<br>4.48     | 7648<br>79.57    | 5676<br>33.27   | 2616<br>-38.58   |
| <i>Graphium cloanthus</i>     | 11340                                                                      | 37970<br>234.83 | 18780<br>65.61  | 7550<br>-33.42   | 21883<br>92.97   | 18483<br>62.99  | 34124<br>200.92  |
| <i>Graphium confucius</i>     | 64906                                                                      | 73636<br>13.45  | 88604<br>36.51  | 93053<br>43.37   | 69632<br>7.28    | 92890<br>43.11  | 92961<br>43.22   |
| <i>Graphium doson</i>         | 4753                                                                       | 1170<br>-75.38  | 1035<br>-78.22  | 5752<br>21.02    | 8075<br>69.89    | 12735<br>167.94 | 5848<br>23.04    |

| Species                         | Suitable area (km <sup>2</sup> )       |                 |                 |                 |                 |                 |                  |
|---------------------------------|----------------------------------------|-----------------|-----------------|-----------------|-----------------|-----------------|------------------|
|                                 | Percentage of suitable area change (%) |                 |                 |                 |                 |                 |                  |
|                                 | Current                                | 2050s<br>RCP2.6 | 2050s<br>RCP4.5 | 2050s<br>RCP8.5 | 2070s<br>RCP2.6 | 2070s<br>RCP4.5 | 2070s<br>RCP8.5  |
| <i>Graphium eurous</i>          | 5763                                   | 36584<br>534.81 | 15943<br>176.64 | 16001<br>177.65 | 8899<br>54.42   | 10953<br>90.06  | 22602<br>292.19  |
| <i>Graphium mandarinus</i>      | 7664                                   | 27996<br>265.29 | 8750<br>14.17   | 2295<br>-70.05  | 24729<br>222.66 | 32699<br>326.66 | 42338<br>452.43  |
| <i>Graphium parus</i>           | 6960                                   | 13552<br>94.71  | 20055<br>188.15 | 28303<br>306.65 | 12036<br>72.93  | 15798<br>126.98 | 36686<br>427.10  |
| <i>Graphium sarpedon</i>        | 8504                                   | 15134<br>77.96  | 10119<br>18.99  | 13298<br>56.37  | 12794<br>50.45  | 8771<br>3.14    | 9586<br>12.72    |
| <i>Graphium sichuanica</i>      | 4547                                   | 4903<br>7.83    | 4442<br>-2.31   | 8056<br>77.17   | 4737<br>4.18    | 3337<br>-26.61  | 5924<br>30.28    |
| <i>Graphium tamerlanus</i>      | 2888                                   | 3439<br>19.08   | 3253<br>12.64   | 5687<br>96.92   | 3151<br>9.11    | 2272<br>-21.33  | 4468<br>54.71    |
| <i>Teinopalpus imperialis</i>   | 4004                                   | 6099<br>52.32   | 9047<br>125.95  | 18368<br>358.74 | 8927<br>122.95  | 27426<br>584.97 | 46051<br>1050.12 |
| <i>Pachliopta aristolochiae</i> | 4618                                   | 31722<br>586.92 | 8465<br>83.30   | 0<br>-100       | 5468<br>18.41   | 1494<br>-67.65  | 2287<br>-50.48   |
| <i>Troides aeacus</i>           | 8195                                   | 8350<br>1.89    | 5515<br>-32.70  | 9809<br>19.69   | 13139<br>60.33  | 14397<br>75.68  | 5848<br>-28.64   |
| <i>Byasa confusus</i>           | 6007                                   | 6184<br>2.95    | 6220<br>3.55    | 7885<br>31.26   | 6304<br>4.94    | 5530<br>-7.94   | 6643<br>10.59    |
| <i>Byasa daemonius</i>          | 14670                                  | 47674<br>224.98 | 43513<br>196.61 | 34298<br>133.80 | 28137<br>91.80  | 38122<br>159.86 | 62277<br>324.52  |
| <i>Byasa dasarada</i>           | 6261                                   | 11604<br>85.34  | 6527<br>4.25    | 288<br>-95.40   | 9207<br>47.05   | 4082<br>-34.80  | 480<br>-92.33    |
| <i>Byasa genestieri</i>         | 3245                                   | 4732<br>45.82   | 7625<br>134.98  | 2428<br>-25.18  | 7580<br>133.59  | 15932<br>390.97 | 37260<br>1048.23 |
| <i>Byasa hedistus</i>           | 15092                                  | 51069<br>238.38 | 56189<br>272.31 | 12516<br>-17.07 | 35090<br>132.51 | 38169<br>152.91 | 56325<br>273.21  |
| <i>Byasa latreillei</i>         | 1172                                   | 879<br>-25      | 103<br>-91.21   | 181<br>-84.56   | 2453<br>109.30  | 2083<br>77.73   | 731<br>-37.63    |
| <i>Byasa nevillei</i>           | 8901                                   | 36806<br>313.50 | 25675<br>188.45 | 17005<br>91.05  | 20815<br>133.85 | 19094<br>114.52 | 34042<br>282.45  |
| <i>Byasa plutonius</i>          | 11916                                  | 40885<br>243.11 | 30186<br>153.32 | 19920<br>67.17  | 23314<br>95.65  | 30333<br>154.56 | 35927<br>201.50  |
| <i>Byasa polyeuctes</i>         | 13201                                  | 50927<br>285.78 | 34251<br>159.46 | 19445<br>47.30  | 31355<br>137.52 | 36898<br>179.51 | 46598<br>252.99  |
| <i>Byasa rhadinus</i>           | 6242                                   | 0-100           | 7830<br>25.44   | 1709<br>-72.62  | 3<br>-99.95     | 11418<br>82.92  | 8467<br>35.65    |
| <i>Meandrusa lachinus</i>       | 6576                                   | 0<br>-100       | 0<br>-100       | 3003<br>-54.33  | 6583<br>0.11    | 25391<br>286.12 | 433<br>-93.42    |
| <i>Meandrusa sciron</i>         | 3802                                   | 4722<br>24.20   | 4749<br>24.91   | 7923<br>108.39  | 4369<br>14.91   | 3622<br>-4.73   | 6379<br>67.78    |
| <i>Papilio agestor</i>          | 5288                                   | 9240<br>74.74   | 5540<br>4.77    | 0<br>-100       | 9506<br>79.77   | 9919<br>87.58   | 19265<br>264.32  |

| Species                   | Suitable area (km <sup>2</sup> )       |                 |                 |                 |                 |                 |                 |
|---------------------------|----------------------------------------|-----------------|-----------------|-----------------|-----------------|-----------------|-----------------|
|                           | Percentage of suitable area change (%) |                 |                 |                 |                 |                 |                 |
|                           | Current                                | 2050s<br>RCP2.6 | 2050s<br>RCP4.5 | 2050s<br>RCP8.5 | 2070s<br>RCP2.6 | 2070s<br>RCP4.5 | 2070s<br>RCP8.5 |
| <i>Papilio alcmenor</i>   | 8024                                   | 22927<br>185.73 | 10373<br>29.27  | 14183<br>76.76  | 13482<br>68.02  | 10700<br>33.35  | 13771<br>71.62  |
| <i>Papilio arcturus</i>   | 7252                                   | 21042<br>190.15 | 9283<br>28.01   | 11058<br>52.48  | 12155<br>67.61  | 9301<br>28.25   | 8702<br>19.99   |
| <i>Papilio bianor</i>     | 9806                                   | 48932<br>399.00 | 40332<br>311.30 | 27730<br>182.79 | 27318<br>178.58 | 30883<br>214.94 | 52800<br>438.45 |
| <i>Papilio bootes</i>     | 8842                                   | 31154<br>252.34 | 12427<br>40.55  | 10593<br>19.80  | 14962<br>69.22  | 8713<br>-1.46   | 9467<br>7.07    |
| <i>Papilio epycides</i>   | 8733                                   | 38027<br>335.44 | 25057<br>186.92 | 1602<br>-81.66  | 15343<br>75.69  | 10066<br>15.26  | 30793<br>252.61 |
| <i>Papilio helenus</i>    | 9042                                   | 22518<br>149.04 | 15339<br>69.64  | 22608<br>150.03 | 17143<br>89.59  | 17472<br>93.23  | 36255<br>300.96 |
| <i>Papilio krishna</i>    | 9281                                   | 27290<br>194.04 | 23475<br>152.94 | 30681<br>230.58 | 19343<br>108.42 | 20614<br>122.11 | 51754<br>457.63 |
| <i>Papilio maackii</i>    | 15659                                  | 53042<br>238.73 | 43995<br>180.96 | 44910<br>186.80 | 33249<br>112.33 | 46626<br>197.76 | 58662<br>274.62 |
| <i>Papilio machaon</i>    | 15561                                  | 57868<br>271.88 | 44036<br>182.99 | 34381<br>120.94 | 33838<br>117.45 | 39679<br>154.99 | 73916<br>375.01 |
| <i>Papilio macilentus</i> | 6244                                   | 6366<br>1.95    | 6111<br>-2.13   | 10200<br>63.36  | 6148<br>-1.54   | 4520<br>-27.61  | 7577<br>21.35   |
| <i>Papilio memnon</i>     | 4528                                   | 11955<br>164.02 | 4899<br>8.19    | 7385<br>63.10   | 8540<br>88.60   | 6193<br>36.77   | 4818<br>6.40    |
| <i>Papilio nephelus</i>   | 6043                                   | 10834<br>79.28  | 5125<br>-15.19  | 7270<br>20.30   | 9749<br>61.33   | 7901<br>30.75   | 3811<br>-36.94  |
| <i>Papilio paris</i>      | 5653                                   | 13436<br>137.68 | 8450<br>49.48   | 12777<br>126.02 | 11888<br>110.30 | 13839<br>144.81 | 17269<br>205.48 |
| <i>Papilio polytes</i>    | 13325                                  | 48352<br>262.87 | 31844<br>138.98 | 16528<br>24.04  | 33070<br>148.18 | 36782<br>176.04 | 56759<br>325.96 |
| <i>Papilio protenor</i>   | 8305                                   | 29844<br>259.35 | 17109<br>106.01 | 17276<br>108.02 | 19145<br>130.52 | 18670<br>124.80 | 29554<br>255.86 |
| <i>Papilio xuthus</i>     | 14358                                  | 49910<br>247.61 | 33499<br>133.31 | 17508<br>21.94  | 36172<br>151.93 | 39124<br>172.49 | 59355<br>313.39 |
