# Supplementary figures and images for: Species Richness of Papilionidae Butterflies (Lepidoptera: Papilionoidea) in the Hengduan Mountains and Its Future Shifts under Climate Change
Source: MDPI journal article supplement (doi:10.3390/insects14030259), 2023-03-06

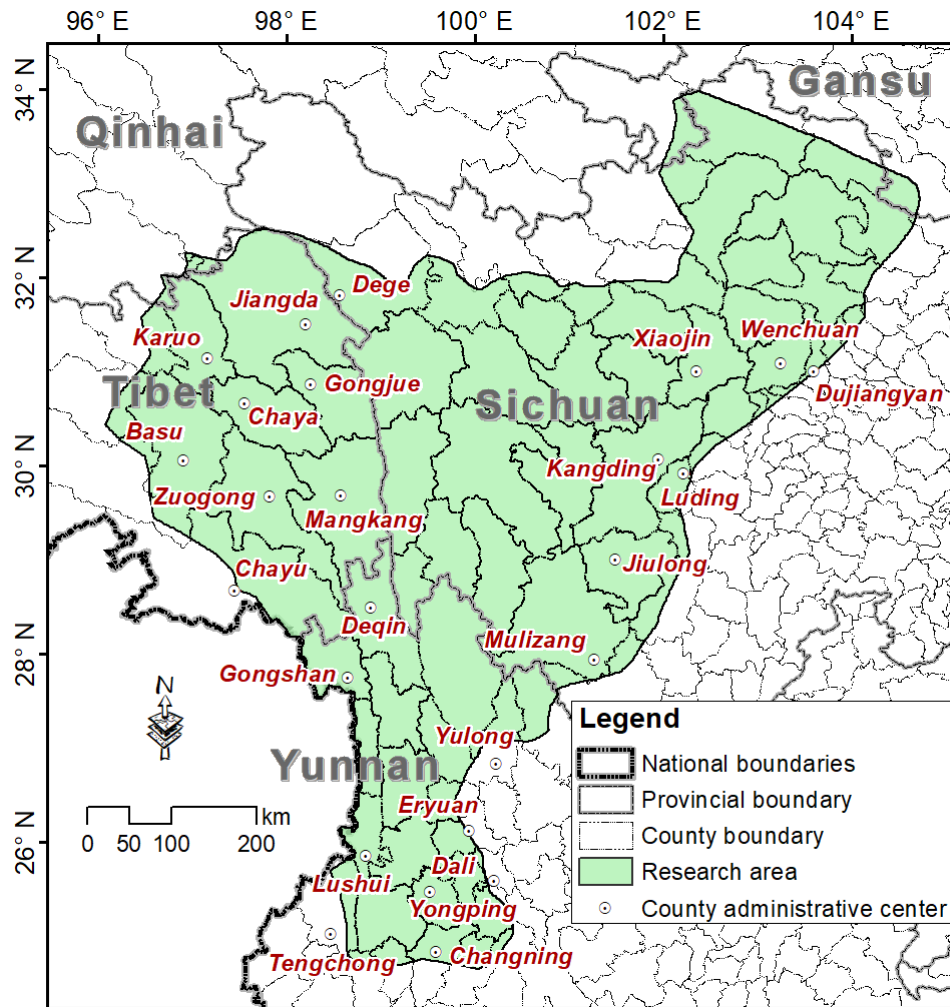

**Figure S1.** Location of the counties in the HDMs mentioned in this research

Supplement: s1 [file s1]

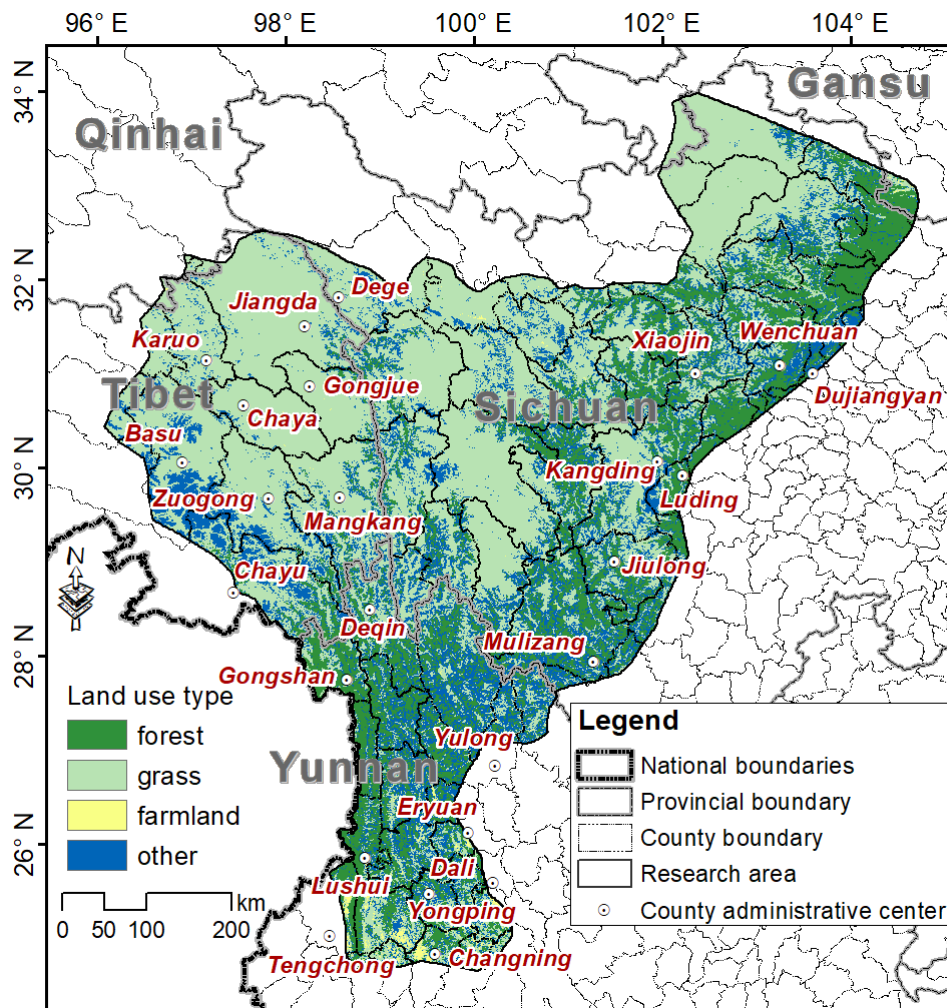

**Figure S2.** Land use types in the HDMs.

Supplement: s1 [file s1]
